# Supplementary material for: Simulating more realistic predation threat using attack playbacks
Source: PeerJ. 2019 Dec 19;7:e8149. doi: 10.7717/peerj.8149 (PMC6925948; doi:10.7717/peerj.8149)
Supplement: Data S1 — Full results for experiment 1 and experiment 2 as used in the analysis. [file peerj-07-8149-s001.xlsx]

## Sheet: Experiment 1
observationID	subject	treatment	predatorID	interaction (s)	safe zone (s)	attention (s)	aggression
1	1	Live predator	2	221.8	34.2	225.8	12
2	2	frontal playback	3	140.2	70.4	124.8	9
3	1	frontal playback	2	41.6	56	167.4	1
4	2	lateral playback	3	47.6	95.8	176.2	0
5	1	lateral playback	2	9	169	207.4	0
6	2	Live predator	3	165.4	56.8	181.4	31
7	1	control	NA	0	206.2	279.8	0
8	2	moving square	NA	99	183.4	21.2	0
9	1	moving square	NA	65.6	98.4	220.4	7
10	2	control	NA	300	0	0	0
11	3	control	NA	272.2	3.6	229	15
12	4	moving square	NA	26.8	92.4	177.4	0
13	3	frontal playback	2	300	0	288.8	22
14	4	lateral playback	3	40.8	94.8	183	0
15	3	lateral playback	2	178.4	2.4	190.6	10
16	4	control	NA	0	244.2	235	0
17	3	Live predator	2	280.2	11.2	221.8	14
18	4	frontal playback	3	77.4	54.2	138.4	4
19	3	moving square	NA	248.8	0	147.6	6
20	4	Live predator	3	231.6	14	228.8	13
21	5	moving square	NA	0	300	0	0
22	6	moving square	NA	4.8	169	177.8	0
23	5	frontal playback	2	216.8	25.4	221.6	24
24	6	lateral playback	3	100	90.8	171.8	1
25	5	control	NA	0	300	136.6	0
26	6	frontal playback	3	99.6	86.8	142.2	15
27	5	lateral playback	2	100	109.4	203.2	6
28	6	control	NA	15.8	142.8	107.4	0
29	5	Live predator	2	147.4	140.6	178.4	2
30	6	Live predator	3	277.4	10.8	242.4	13
31	7	moving square	NA	300	0	175	21
32	8	lateral playback	3	292.8	0	235.4	4
33	7	control	NA	58.4	230.4	75.8	26
34	8	frontal playback	3	300.2	0	73.6	0
35	7	lateral playback	2	217.4	18.4	198.2	5
36	8	moving square	NA	265	0	149.8	6
37	7	frontal playback	2	298	0	200.2	36
38	8	Live predator	3	0	300	0	0
39	7	Live predator	2	300	0	297.4	9
40	8	control	NA	300	0	300	2
41	9	lateral playback	2	26	204	166.6	1
42	10	frontal playback	3	204	18.6	157.8	2
43	9	frontal playback	2	211	9.4	196.8	0
44	10	moving square	NA	193	0	210.4	0
45	9	control	NA	74.8	93.6	199	0
46	10	lateral playback	3	69.4	153.2	119	9
47	9	Live predator	2	300	0	298.4	42
48	10	control	NA	76.2	31.4	208.4	2
49	9	moving square	NA	192.6	13	213.6	0
50	10	Live predator	3	219.4	24.4	221.8	18
51	11	Live predator	2	207.6	81	290.4	2
52	12	moving square	NA	37.2	99.4	177.2	0
53	11	frontal playback	2	47.4	202.2	193.8	0
54	12	control	NA	8.6	193.4	171.4	0
55	11	lateral playback	2	157.4	36.6	188.8	0
56	12	lateral playback	3	257.6	0	241.8	1
57	11	moving square	NA	10.4	248.4	182	0
58	12	Live predator	3	297.4	0	298	15
59	11	control	NA	7.8	274.2	65.8	0
60	12	frontal playback	3	300	0	287.8	4
61	13	frontal playback	2	56.2	139.6	116.4	6
62	14	frontal playback	3	127.6	45	181.6	0
63	13	lateral playback	2	151.2	79.6	143	1
64	14	control	NA	164.8	9.8	147.6	0
65	13	control	NA	61.2	180	137.4	0
66	14	Live predator	3	268.2	0	246.2	17
67	13	moving square	NA	106.6	79.2	130.8	0
68	14	lateral playback	3	206.8	6.8	156.4	1
69	13	Live predator	2	129.8	41.8	222.4	14
70	14	moving square	NA	256.4	0	180.6	0
71	15	control	NA	0	2.4	225.8	0
72	16	lateral playback	3	260.2	5.2	244	0
73	15	frontal playback	2	237.8	1.6	182.6	7
74	16	moving square	NA	28.8	64.2	183	0
75	15	Live predator	2	288.2	1.2	287.4	17
76	16	frontal playback	3	145.2	32.4	162.8	1
77	15	lateral playback	2	255	17.8	209	6
78	16	Live predator	3	281.2	3.4	284.2	26
79	15	moving square	2	117.6	6	251.4	2
80	16	control	NA	195.6	8	222.2	0

## Sheet: Experiment 2
Subject	Treatement	observationID	PredatorID	interaction zone (s)	safe zone (s)	Aggression	Attention (s)
1	predator	1	1	300	0	0	0
2	control	2	3	2	285,2	0	116,2
3	skin extract	3	9	300	0	40	272,8
4	predator+skin extract	4	7	0	286,6	0	143,2
5	predator	5	2	24,4	200,6	0	99,4
6	predator+skin extract	6	8	0	293,8	2	31,2
1	control	7	3	0	294,4	0	16,4
2	predator	8	7	8	207,8	0	137
3	predator+skin extract	9	1	268,2	9,6	26	244,6
4	skin extract	10	2	106,2	124,2	1	168
5	skin extract	11	8	0	279,8	1	91
6	control	12	9	33,2	228,8	0	103,6
1	predator+skin extract	13	9	68,6	82	3	79,8
2	skin extract	14	2	0	220,4	0	176,8
3	control	15	7	122,6	156,6	3	180
4	predator	16	8	7,8	284,4	0	97,2
5	predator+skin extract	17	1	48,8	182,4	8	116,4
6	predator	18	3	78,8	106,4	4	175,2
1	skin extract	19	8	44,2	39,8	1	145
2	predator+skin extract	20	9	0	250	1	152,4
3	predator	21	3	138,2	132,4	8	169,8
4	control	22	1	162	44,8	4	180,6
5	control	23	7	10,4	201,2	1	94,2
6	skin extract	24	2	39,8	134,8	1	145,4
7	predator	25	3	265	28,8	3	168,4
8	skin extract	26	9	161	17	0	246,4
9	predator+skin extract	27	2	0	297	0	138,6
10	predator	28	7	45,8	241	0	19
11	predator+skin extract	29	8	25,6	265,6	0	259,4
12	skin extract	30	1	123,2	92	2	224,8
7	skin extract	31	7	178,4	77	0	143,4
8	control	32	3	224	0	0	233
9	control	33	1	0	150,6	1	127,6
10	control	34	8	0	300	0	129,4
11	control	35	2	0	262,4	0	141,8
12	predator+skin extract	36	9	2,6	231,8	0	174
7	control	37	2	206,2	41,2	2	221,6
8	predator+skin extract	38	8	177	24,8	0	195,4
9	skin extract	39	9	31	160,2	0	127,8
10	skin extract	40	1	0	272	1	58,6
11	predator	41	3	19,8	227,6	3	157
12	predator	42	7	2,2	209,8	0	166,8
7	predator+skin extract	43	1	111	127	3	136,8
8	predator	44	7	69	37,8	0	169,2
9	predator	45	8	3	199,4	0	115,4
10	predator+skin extract	46	3	0	300	0	3,2
11	skin extract	47	9	67	111,4	4	126
12	control	48	2	93,2	48,4	1	144,8
13	predator	49	1	89,6	71,2	0	214,8
14	control	50	8	0	293,6	0	120,4
15	predator	51	3	12	211,2	0	208,8
16	control	52	2	174,4	45,6	3	226
17	predator	53	9	0	295,4	0	83,8
18	control	54	7	193,8	67,4	1	236,8
13	predator+skin extract	55	3	74,6	175,2	0	254,6
14	predator+skin extract	56	2	0	271,6	0	181,6
15	control	57	1	210,6	1	5	203,4
16	predator	58	7	150,4	98,2	3	152
17	skin extract	59	8	0	293,4	0	263,6
18	skin extract	60	9	76,6	43,4	3	176,2
13	control	61	8	0	264,8	0	146,4
14	predator	62	9	0	174,8	0	156,8
15	skin extract	63	7	23,4	31,4	0	157,4
16	predator+skin extract	64	3	181	5,6	9	159,6
17	control	65	2	41,6	145,4	1	206,4
18	predator+skin extract	66	1	28,4	122,2	4	192
13	skin extract	67	2	64,4	77	0	113,2
14	skin extract	68	7	9,2	215,6	0	125,6
15	predator+skin extract	69	9	44,4	67,2	0	146,6
16	skin extract	70	8	34	84,6	0	138,4
17	predator+skin extract	71	1	116,2	0	2	181,6
18	predator	72	3	0	164,6	0	139,6
